# Supplementary material
Source: PubMed Central journal article supplement (PMC5439299)
Supplement: NIHMS850822-supplement-supplement_1.pdf [file NIHMS850822-supplement-supplement_1.pdf]

## **Pneumonia After Cardiac Surgery: Experience of the NIH/CIHR Cardiothoracic Surgical Trials Network**

Gorav Ailawadi, MD, Helena L. Chang, MS, Patrick T. O’Gara, MD, Karen O’Sullivan, MPH, Y. Joseph Woo, MD, Joseph J. DeRose, Jr., MD, Michael K. Parides, PhD, Vinod H. Thourani, MD, Sophie Robichaud, RT, A. Marc Gillinov, MD, Wendy C. Taddei-Peters, PhD, Marissa A. Miller, DVM, Louis P. Perrault, MD, Robert L. Smith, MD, Lyn Goldsmith, RN, Keith A. Horvath, Kristen Doud, PhD, Kim Baio, RN, Annetine C. Gelijns, PhD, Alan J. Moskowitz, MD, Emilia Bagiella, PhD, John H. Alexander, MD, Alexander Iribarne, MD.

### **Online Supplementary Material**

## **Supplemental Material**

**Appendix EI: Primary Endpoint Definition and Variables for Cox Regression**

**Appendix EII: CTSN Members**

## Appendix EI: Primary Endpoint Definition and Variables for Cox Regression

### Definition of Pneumonia

To be classified as pneumonia, the following criteria must have been met (adapted from the CDC/NHSN guidelines for the clinical diagnosis of pneumonia):

1. At least one or more chest radiographs no earlier than two days post-surgery with at least 1 of the following: (a) new or progressive and persistent infiltrate, (b) consolidation, or (c) cavitation.
2. Patient has at least 1 of the following signs or symptoms: fever ( $>38^{\circ}\text{C}$ ) with no other recognized cause, leukopenia ( $<4,000$  WBC/mm<sup>3</sup>) or leukocytosis ( $\geq 12,000$  WBC/mm<sup>3</sup>), or altered mental status with no other recognized cause (for patients  $\geq 70$  years old) and at least 2 of the following: (a) new onset of purulent sputum or change in character or sputum or increased respiratory secretions or increased suctioning requirements, (b) new onset or worsening cough, or dyspnea, or tachypnea, (c) rales or bronchial breath sounds, (d) worsening gas exchange (e.g. oxygen desaturations, increased oxygen requirements, or increased ventilator demand)

### Variables tested in the Stage 1 baseline risk model and their crude association with pneumonia

|                              | # (%) Pneumonia | Unadjusted<br>HR (95% CI) | P-value <sup>†</sup> |
|------------------------------|-----------------|---------------------------|----------------------|
| <b>Demographics</b>          |                 |                           |                      |
| Age, (years)                 |                 | 1.02 (1.00, 1.03)         | 0.02                 |
| Gender                       |                 | 1.07 (0.73, 1.56)         | 0.73                 |
| Male                         | 84 (2.4)        |                           |                      |
| Female                       | 39 (2.3)        |                           |                      |
| Race                         |                 | 0.56 (0.38, 0.85)         | 0.01                 |
| White                        | 92 (2.1)        |                           |                      |
| Non-White                    | 31 (3.7)        |                           |                      |
| BMI, (kg/m <sup>2</sup> )    |                 | 1.00 (0.96, 1.03)         | 0.83                 |
| Insurance                    |                 |                           | 0.59                 |
| Medicaid                     | 8 (3.4)         | 1.79 (0.73, 4.38)         |                      |
| Medicare                     | 51 (2.6)        | 1.38 (0.74, 2.59)         |                      |
| Government (Other)           | 12 (1.9)        | 1.00 (ref)                |                      |
| Private                      | 45 (2.1)        | 1.12 (0.59, 2.11)         |                      |
| None/Self                    | 7 (2.7)         | 1.41 (0.55, 3.59)         |                      |
| <b>Baseline Laboratories</b> |                 |                           |                      |
| WBC, x10 <sup>3</sup> /ml    |                 | 1.03 (0.99, 1.07)         | 0.19                 |
| Creatinine, mg/dL            |                 | 1.14 (1.07, 1.22)         | < 0.001              |

|                             | # (%) Pneumonia | Unadjusted<br>HR (95% CI) | P-value <sup>†</sup> |
|-----------------------------|-----------------|---------------------------|----------------------|
| Hemoglobin, g/dL            |                 | 0.80 (0.73, 0.88)         | < 0.001              |
| <b>Cardiac morbidity</b>    |                 |                           |                      |
| Hypertension                |                 | 1.60 (1.01, 2.54)         | 0.04                 |
| Yes                         | 101 (2.6)       |                           |                      |
| No                          | 22 (1.7)        |                           |                      |
| Heart failure               |                 | 2.19 (1.53, 3.11)         | < 0.001              |
| Yes                         | 58 (3.9)        |                           |                      |
| No                          | 65 (1.8)        |                           |                      |
| Previous cardiac surgery    |                 | 1.98 (1.35, 2.89)         | < 0.001              |
| Yes                         | 38 (4.0)        |                           |                      |
| No                          | 85 (2.0)        |                           |                      |
| <b>Noncardiac morbidity</b> |                 |                           |                      |
| Corticosteroids             |                 | 2.82 (1.52, 5.21)         | 0.001                |
| Yes                         | 11 (6.3)        |                           |                      |
| No                          | 112 (2.3)       |                           |                      |
| Diabetes <sup>‡</sup>       |                 | 1.05 (0.69, 1.60)         | 0.81                 |
| Yes                         | 29 (2.5)        |                           |                      |
| No                          | 94 (2.4)        |                           |                      |
| History of Smoking          |                 |                           | 0.06                 |
| No                          | 52 (1.9)        | 1.00 (ref)                |                      |
| Current                     | 23 (3.4)        | 1.76 (1.08, 2.88)         |                      |
| Former                      | 47 (2.7)        | 1.38 (0.93, 2.05)         |                      |
| COPD                        |                 | 2.58 (1.75, 3.78)         | < 0.001              |
| Yes                         | 37 (5.0)        |                           |                      |
| No                          | 86 (1.9)        |                           |                      |
| Cerebrovascular Accident    |                 | 1.06 (0.59, 1.88)         | 0.85                 |
| Yes                         | 13 (2.5)        |                           |                      |
| No                          | 110 (2.4)       |                           |                      |

|                             | # (%) Pneumonia | Unadjusted<br>HR (95% CI) | P-value <sup>†</sup> |
|-----------------------------|-----------------|---------------------------|----------------------|
| Peripheral Vascular Disease |                 | 1.59 (0.97, 2.59)         | 0.06                 |
| Yes                         | 19 (3.6)        |                           |                      |
| No                          | 104 (2.2)       |                           |                      |
| <b>Operative</b>            |                 |                           |                      |
| Surgery time, hours         |                 | 1.44 (1.31, 1.58)         | < 0.001              |
| Bypass                      |                 | 1.10 (0.58, 2.11)         | 0.77                 |
| Yes                         | 113 (2.4)       |                           |                      |
| No                          | 10 (2.2)        |                           |                      |
| Circulatory Arrest          |                 | 2.19 (1.21, 3.97)         | 0.01                 |
| Yes                         | 12 (4.9)        |                           |                      |
| No                          | 111 (2.3)       |                           |                      |
| Sternotomy                  |                 | 0.78 (0.46, 1.32)         | 0.35                 |
| Full                        | 107 (2.5)       |                           |                      |
| Not Full                    | 16 (1.9)        |                           |                      |
| Surgery Type                |                 |                           | 0.08                 |
| Elective                    | 80 (2.1)        | 1.00 (ref)                |                      |
| Urgent                      | 38 (3.1)        | 1.50 (1.02, 2.20)         |                      |
| Emergent                    | 5 (3.6)         | 1.72 (0.70, 4.22)         |                      |
| Procedure                   |                 | 4.99 (2.84, 8.78)         | < 0.001              |
| LVAD/Tx                     | 13 (10.7)       |                           |                      |
| All Others                  | 110 (2.2)       |                           |                      |
| Previous IABP               |                 | 1.51 (0.55, 4.10)         | 0.42                 |
| Yes                         | 4 (3.5)         |                           |                      |
| No                          | 119 (2.4)       |                           |                      |

Abbreviations: CABG, coronary artery bypass grafting; CI, confidence interval; COPD, chronic obstructive pulmonary disease; HR, hazard ratio; LVAD/Tx, left ventricular assist device or heart transplant surgery.

†Based on competing risk model with time to pneumonia as outcome, baseline factors as covariates, and death as competing risk.

‡Insulin or oral medications.

Variables not used because of small cell counts: The sternum was not closed for 16 patients and only 1 of whom developed pneumonia.

Variables not used because of excessive missing data: Ejection fraction

**Variables tested in the Stage 2 process of care model and their crude association with pneumonia**

| Management Practice                                         | # (%) Pneumonia | Unadjusted HR (95% CI) | P Value <sup>†</sup> |
|-------------------------------------------------------------|-----------------|------------------------|----------------------|
| Correct timing of preoperative antibiotics prior to surgery |                 | 0.76 (0.48-1.22)       | 0.26                 |
| Yes                                                         | 102 (2.3)       |                        |                      |
| No                                                          | 21 (3.0)        |                        |                      |
| Nasopharyngeal decontamination                              |                 | 0.80 (0.56-1.15)       | 0.24                 |
| Yes                                                         | 51 (2.1)        |                        |                      |
| No                                                          | 71 (2.6)        |                        |                      |
| Scrubbing of surgical site                                  |                 |                        | 0.01                 |
| No                                                          | 5 (6.4)         | 1.00 (ref)             |                      |
| Yes with chlorhexidine                                      | 106 (2.6)       | 0.39 (0.16-0.96)       |                      |
| Yes without chlorhexidine                                   | 12 (1.3)        | 0.20 (0.07-0.55)       |                      |
| Appropriate dosing of intraoperative antibiotics            |                 | 0.47 (0.21-1.06)       | 0.07                 |
| Yes                                                         | 117 (2.3)       |                        |                      |
| No                                                          | 6 (4.9)         |                        |                      |
| Postoperative antibiotics duration                          |                 |                        | <0.001               |
| ≤24 hours                                                   | 48 (1.8)        | 1.16 (0.75-1.79)       |                      |

| Management Practice      | # (%) Pneumonia | Unadjusted HR (95% CI) | P Value <sup>†</sup> |
|--------------------------|-----------------|------------------------|----------------------|
| 24-48 hours              | 34 (1.6)        | 1.00 (ref)             |                      |
| >48 hours                | 41 (9.4)        | 6.09 (3.87-9.59)       |                      |
| Second generation CEPH   |                 | 0.68 (0.47, 0.98)      | 0.04                 |
| Yes                      | 46 (1.9)        |                        |                      |
| No                       | 77 (2.8)        |                        |                      |
| Ventilation              |                 |                        | <0.001               |
| ≤24 hours                | 46 (1.1)        | 1.00 (ref)             |                      |
| 24 – 48 hours            | 32 (4.7)        | 4.25 (2.71, 6.68)      |                      |
| > 48 hours               | 43 (11.1)       | 10.36 (6.84, 15.67)    |                      |
| NG Tube                  |                 | 1.84 (1.15, 2.94)      | 0.01                 |
| Yes                      | 102 (2.7)       |                        |                      |
| No                       | 21 (1.5)        |                        |                      |
| Femoral line             |                 | 3.58 (1.13-11.32)      | 0.03                 |
| Yes                      | 3 (8.1)         |                        |                      |
| No                       | 120 (2.3)       |                        |                      |
| More than 1 central line |                 | 2.39 (1.56-3.67)       | <0.001               |
| Yes                      | 27 (4.9)        |                        |                      |
| No                       | 96 (2.1)        |                        |                      |
| Glucose management       |                 | 1.21 (0.85-1.73)       | 0.30                 |
| Hyperglycemic            | 58 (2.6)        |                        |                      |
| Non-hyperglycemic        | 63 (2.2)        |                        |                      |
| PRBC (unit)              |                 | 1.30 (1.24, 1.36)      | <0.001               |

| Management Practice | # (%) Pneumonia | Unadjusted HR (95% CI) | P Value <sup>†</sup> |
|---------------------|-----------------|------------------------|----------------------|
| Platelet            |                 | 2.13 (1.50, 3.04)      | <0.001               |
| Yes                 | 60 (3.7)        |                        |                      |
| No                  | 63 (1.8)        |                        |                      |

Abbreviations: CI, confidence interval; CEPH, cephalosporin; HR, hazard ratio; NG, nasogastric tube; PRBC, packed red blood cells

<sup>†</sup>Based on competing risk model with time to pneumonia as outcome, management practices as covariates, and death as competing risk.

Variable not used because of small cell counts:

1. Elevation of head of bed: Among the 18 patients who did not have elevation of head of bed, only 1 developed pneumonia.
2. Aspiration of secretions: Among the 201 patients who did not have aspiration of secretions, only 1 developed pneumonia.



### 3. Appendix EII: CTSN Members

The members of the Cardiothoracic Surgical Trials Network (CTSN) involved in this study were as follows:

**National Heart, Lung and Blood Institute:** Marissa A. Miller, Wendy C. Taddei-Peters, Dennis Buxton, Ron Caulder, Nancy L. Geller, David Gordon, Neal O. Jeffries, Albert Lee;

**National Institute of Neurological Disorders and Stroke:** Claudia S. Moy;

**Canadian Institutes of Health Research:** Ilana Kogan Gombos, Jennifer Ralph;

**Network Chairs:** *Christiana Care Health System*, Timothy J. Gardner, (Chair); *Brigham and Women's Hospital*, Patrick T. O'Gara, (Co-Chair);

**Data Coordinating Center:** *International Center for Health Outcomes and Innovation Research at Icahn School of Medicine at Mount Sinai*, Annetine C. Gelijns, Michael K. Parides, Deborah D. Ascheim, Alan J. Moskowitz, Ellen Moquete, Eric A. Rose, Melissa Chase, Yingchun Chen, Rosemarie Gagliardi, Lopa Gupta, Edlira Kumbarce, Ron Levitan, Karen O'Sullivan, Milerva Santos, Alan Weinberg, Paula Williams, Carrie Wood, Xia Ye;

**Core Clinical Site Investigators:** *Cleveland Clinic Foundation*, Eugene H. Blackstone (PI), A. Marc Gillinov, Pamela Lackner, Leoma Berroteran, Diana Dolney, Suzanne Fleming, Roberta Palumbo, Christine Whitman, Kathy Sankovic, Denise Kosty Sweeney; *NHLBI Clinical Research Scholars:* Gregory Pattakos, Pamela A. Clarke; *Columbia University*, Michael Argenziano (PI), Mathew Williams, Lyn Goldsmith, Craig R. Smith, Yoshifumi Naka, Allan Stewart, Allan Schwartz; Daniel Bell, Danielle Van Patten; *Duke University*, Peter K. Smith (PI), Stacey Welsh, John H. Alexander, Carmelo A. Milano, Donald D. Glower, Joseph P. Mathew, J. Kevin Harrison; *NHLBI Clinical Research Scholars:* Mark F. Berry, Cyrus J. Parsa, Betty C. Tong, Judson B. Williams; *East Carolina Heart Institute*, T. Bruce Ferguson (PI), Alan P. Kypson, Evelio Rodriguez, Malissa Harris, Brenda Akers, Allison O'Neal; *Emory University*, John D. Puskas (PI), Vinod H. Thourani, Robert Guyton, Jefferson Baer, Kim Baio, Alexis A. Neill; *Montefiore-Einstein Heart Center, New York, NY*, Robert E. Michler (PI), David A.

D'Alessandro, Joseph J. DeRose, Jr., Daniel J. Goldstein, Ricardo Bello, William Jakobleff, Mario Garcia, Cynthia Taub, Daniel Spevak, Roger Swayze; *Montreal Heart Institute*, Louis P. Perrault (PI), Arsène-Joseph Basmadjian, Denis Bouchard, Michel Carrier, Raymond Cartier, Michel Pellerin, Jean François Tanguay, Ismael El-Hamamsy, André Denault, Jonathan Lacharité, Sophie Robichaud; *NIH Heart Center at Suburban Hospital*, Keith A. Horvath (PI), Philip C. Corcoran, Michael P. Siegenthaler, Mandy Murphy, Margaret Iraola, Ann Greenberg; *University of Pennsylvania*, Michael A. Acker (PI), Y. Joseph Woo, Mary Lou Mayer; *University of Virginia*, Irving L. Kron (PI), Gorav Ailawadi, Karen Johnston, John M. Dent, John Kern, Jessica Keim Sandra Burks, Kim Gahring;

**Protocol Review Committee:** David A. Bull (Chair); Patrice Desvigne-Nickens, Executive Secretary; Dennis O. Dixon, Mark Haigney, Richard Holubkov, Alice Jacobs, Frank Miller, John M. Murkin, John Spertus, Andrew S. Wechsler;

**Data and Safety Monitoring Board:** Frank Sellke (Chair); Cheryl L. McDonald, Executive Secretary; Robert Byington, Neal Dickert, Dennis O. Dixon, John S. Ikonomidis, David O. Williams, Clyde W. Yancy;

**Medical Monitors:** James C. Fang, Wayne Richenbacher;

**Overall Event Adjudication Committee:** Vivek Rao (Chair); Karen L. Furie, Rachel Miller, Sean Pinney, William C. Roberts;

**Infection Event Adjudication Committee:** Rachel Miller (Chair); Shirish Huprikar, Marilyn Levi.
